# Supplementary material
Source: PubMed Central journal article supplement (PMC7596690)
Supplement: NIHMS1626053-supplement-1626053_Supp_Tab1.pdf [file NIHMS1626053-supplement-1626053_Supp_Tab1.pdf]

**Supplementary Table S1.** Summary of metrics derived from a intratumor region with highest <sup>18</sup>F-Fluorocholine uptake, using a 3-compartment model with two input curves which accounts for non-specific uptake of radiometabolites.  $K_{1,m}$  and  $k_{2,m}$  represent influx and efflux of metabolites in tissue.

|                                | All lesions<br>(n=20)    | Lesions with pathologic<br>evidence of tumor (n=8) | Lesions with pathologic<br>evidence of no tumor (n=4) | Normal brain<br>(n=12)   |
|--------------------------------|--------------------------|----------------------------------------------------|-------------------------------------------------------|--------------------------|
| $v_B$                          | 0.07±0.07<br>(0.01-0.17) | 0.07±0.07<br>(0.01-0.17)                           | 0.06±0.05<br>(0.01-0.13)                              | 0.04±0.02<br>(0.02-0.07) |
| $K_1$ (mL/min/g)               | 0.59±0.47<br>(0.06-1.61) | 0.77±0.50<br>(0.22-1.61)                           | 0.20±0.10<br>(0.06-0.28)                              | 0.02±0.01<br>(0.01-0.03) |
| $k_2$ (min <sup>-1</sup> )     | 0.12±0.11<br>(0.00-0.31) | 0.15±0.11<br>(0.01-0.31)                           | 0.06±0.07<br>(0.00-0.14)                              | 0.36±0.31<br>(0.07-1.08) |
| $k_3$ (min <sup>-1</sup> )     | 0.07±0.07<br>(0.00-0.21) | 0.09±0.08<br>(0.00-0.21)                           | 0.02±0.03<br>(0.00-0.06)                              | 0.11±0.08<br>(0.02-0.30) |
| $K_{1,m}$ (mL/min/g)           | 0.32±0.37<br>(0.00-1.47) | 0.28±0.26<br>(0.00-0.65)                           | 0.30±0.21<br>(0.08-0.55)                              | 0.07±0.08<br>(0.00-0.24) |
| $k_{2,m}$ (min <sup>-1</sup> ) | 0.12±0.26<br>(0.00-1.04) | 0.06±0.16<br>(0.00-0.42)                           | 0.32±0.48<br>(0.03-1.04)                              | 0.36±0.40<br>(0.00-1.11) |
